# Supplementary material for: Comparative Analysis of the Brassica napus Root and Leaf Transcript Profiling in Response to Drought Stress
Source: MDPI journal article supplement (doi:10.3390/ijms160818752), 2015-08-11
Supplement: s1 [file s1]

## Supplementary Information

**Table S1.** Significantly enriched gene ontology (GO) terms in differentially expressed genes (DEGs) for root.

| Significantly Enriched GO Terms for Root_Cellular Component |                              |                                 |                           |
|-------------------------------------------------------------|------------------------------|---------------------------------|---------------------------|
| Gene Ontology Term                                          | Cluster Frequency            | Genome Frequency of Use         | Corrected <i>p</i> -Value |
| intrinsic to membrane                                       | 489 out of 3832 genes, 12.8% | 2498 out of 22,829 genes, 10.9% | 0.01009                   |
| cell periphery                                              | 373 out of 3832 genes, 9.7%  | 1807 out of 22,829 genes, 7.9%  | 0.00083                   |
| external encapsulating structure                            | 339 out of 3832 genes, 8.8%  | 1586 out of 22,829 genes, 6.9%  | $8.94 \times 10^{-5}$     |
| cell wall                                                   | 172 out of 3832 genes, 4.5%  | 697 out of 22,829 genes, 3.1%   | $8.22 \times 10^{-6}$     |
| anchored to membrane                                        | 52 out of 3832 genes, 1.4%   | 188 out of 22,829 genes, 0.8%   | 0.02144                   |

**Table S2.** Significantly enriched gene ontology (GO) terms in differentially expressed genes (DEGs) for leaf.

| Significantly Enriched GO Terms for Leaf_Cellular Component |                               |                                 |                           |
|-------------------------------------------------------------|-------------------------------|---------------------------------|---------------------------|
| Gene Ontology Term                                          | Cluster Frequency             | Genome Frequency of Use         | Corrected <i>p</i> -Value |
| membrane                                                    | 1289 out of 3554 genes, 36.3% | 7696 out of 22,829 genes, 33.7% | 0.04742                   |
| organelle part                                              | 862 out of 3554 genes, 24.3%  | 4933 out of 22,829 genes, 21.6% | 0.00376                   |
| intracellular organelle part                                | 738 out of 3554 genes, 20.8%  | 4058 out of 22,829 genes, 17.8% | $6.22 \times 10^{-5}$     |
| non-membrane-bounded organelle                              | 397 out of 3554 genes, 11.2%  | 1336 out of 22,829 genes, 5.9%  | $2.73 \times 10^{-39}$    |
| intracellular non-membrane-bounded organelle                | 397 out of 3554 genes, 11.2%  | 1336 out of 22,829 genes, 5.9%  | $2.73 \times 10^{-39}$    |
| cell periphery                                              | 396 out of 3554 genes, 11.1%  | 1807 out of 22,829 genes, 7.9%  | $1.28 \times 10^{-11}$    |
| external encapsulating structure                            | 363 out of 3554 genes, 10.2%  | 1586 out of 22,829 genes, 6.9%  | $2.56 \times 10^{-13}$    |
| ribonucleoprotein complex                                   | 263 out of 3554 genes, 7.4%   | 990 out of 22,829 genes, 4.3%   | $1.41 \times 10^{-17}$    |
| nucleus                                                     | 242 out of 3554 genes, 6.8%   | 1154 out of 22,829 genes, 5.1%  | $6.43 \times 10^{-5}$     |
| nuclear part                                                | 238 out of 3554 genes, 6.7%   | 1119 out of 22,829 genes, 4.9%  | $2.50 \times 10^{-5}$     |
| ribosome                                                    | 237 out of 3554 genes, 6.7%   | 692 out of 22,829 genes, 3.0%   | $9.27 \times 10^{-33}$    |
| nuclear lumen                                               | 224 out of 3554 genes, 6.3%   | 1026 out of 22,829 genes, 4.5%  | $6.89 \times 10^{-6}$     |
| organelle lumen                                             | 224 out of 3554 genes, 6.3%   | 1026 out of 22,829 genes, 4.5%  | $6.89 \times 10^{-6}$     |
| intracellular organelle lumen                               | 224 out of 3554 genes, 6.3%   | 1026 out of 22,829 genes, 4.5%  | $6.89 \times 10^{-6}$     |
| membrane-enclosed lumen                                     | 224 out of 3554 genes, 6.3%   | 1034 out of 22,829 genes, 4.5%  | $1.32 \times 10^{-5}$     |
| extracellular region                                        | 197 out of 3554 genes, 5.5%   | 947 out of 22,829 genes, 4.1%   | 0.00137                   |
| ribosomal subunit                                           | 180 out of 3554 genes, 5.1%   | 467 out of 22,829 genes, 2.0%   | $7.28 \times 10^{-32}$    |
| cell wall                                                   | 163 out of 3554 genes, 4.6%   | 697 out of 22,829 genes, 3.1%   | $5.20 \times 10^{-6}$     |
| large ribosomal subunit                                     | 97 out of 3554 genes, 2.7%    | 257 out of 22,829 genes, 1.1%   | $5.76 \times 10^{-16}$    |
| cytoskeleton                                                | 86 out of 3554 genes, 2.4%    | 340 out of 22,829 genes, 1.5%   | 0.00038                   |
| small ribosomal subunit                                     | 83 out of 3554 genes, 2.3%    | 210 out of 22,829 genes, 0.9%   | $6.27 \times 10^{-15}$    |
| microtubule cytoskeleton                                    | 74 out of 3554 genes, 2.1%    | 262 out of 22,829 genes, 1.1%   | $2.13 \times 10^{-5}$     |
| anchored to membrane                                        | 66 out of 3554 genes, 1.9%    | 188 out of 22,829 genes, 0.8%   | $5.86 \times 10^{-9}$     |
| chromosome                                                  | 64 out of 3554 genes, 1.8%    | 219 out of 22,829 genes, 1.0%   | $3.93 \times 10^{-5}$     |
| chromosomal part                                            | 58 out of 3554 genes, 1.6%    | 158 out of 22,829 genes, 0.7%   | $1.19 \times 10^{-8}$     |
| chromatin                                                   | 46 out of 3554 genes, 1.3%    | 87 out of 22,829 genes, 0.4%    | $1.43 \times 10^{-13}$    |

Table S2. *Cont.*

| Significantly Enriched GO Terms for Leaf_Cellular Component |                            |                              |                           |
|-------------------------------------------------------------|----------------------------|------------------------------|---------------------------|
| Gene Ontology Term                                          | Cluster Frequency          | Genome Frequency of Use      | Corrected <i>p</i> -Value |
| cytoskeletal part                                           | 24 out of 3554 genes, 0.7% | 69 out of 22,829 genes, 0.3% | 0.01246                   |
| microtubule                                                 | 19 out of 3554 genes, 0.5% | 51 out of 22,829 genes, 0.2% | 0.02475                   |
| cytoplasmic microtubule                                     | 17 out of 3554 genes, 0.5% | 45 out of 22,829 genes, 0.2% | 0.04537                   |

Table S3. KEGG (Kyoto Encyclopedia of Genes and Genomes) pathway results in root and leaf.

| KEGG Pathway Results in Leaf |                                                          |                                              |                                                     |                        |                        |               |
|------------------------------|----------------------------------------------------------|----------------------------------------------|-----------------------------------------------------|------------------------|------------------------|---------------|
| #                            | Pathway                                                  | DEGs with<br>Pathway<br>Annotation<br>(3224) | All Genes<br>with Pathway<br>Annotation<br>(22,126) | <i>p</i> -Value        | <i>Q</i> -Value        | Pathway<br>ID |
| 1                            | Ribosome                                                 | 194 (6.02%)                                  | 623 (2.82%)                                         | $1.14 \times 10^{-26}$ | $1.36 \times 10^{-24}$ | ko03010       |
| 2                            | Plant hormone<br>signal transduction                     | 292 (9.06%)                                  | 1555 (7.03%)                                        | $1.37 \times 10^{-6}$  | $8.22 \times 10^{-5}$  | ko04075       |
| 3                            | Stilbenoid, diarylheptanoid and<br>gingerol biosynthesis | 77 (2.39%)                                   | 316 (1.43%)                                         | $2.52 \times 10^{-6}$  | $9.29 \times 10^{-5}$  | ko00945       |
| 4                            | Carbon fixation in<br>photosynthetic organisms           | 41 (1.27%)                                   | 137 (0.62%)                                         | $3.10 \times 10^{-6}$  | $9.29 \times 10^{-5}$  | ko00710       |
| 5                            | Phenylpropanoid biosynthesis                             | 98 (3.04%)                                   | 456 (2.06%)                                         | $3.75 \times 10^{-5}$  | $9.00 \times 10^{-4}$  | ko00940       |
| 6                            | Glycine, serine and<br>threonine metabolism              | 29 (0.9%)                                    | 98 (0.44%)                                          | 0.000102               | $2.04 \times 10^{-3}$  | ko00260       |
| 7                            | Nitrogen metabolism                                      | 30 (0.93%)                                   | 106 (0.48%)                                         | 0.00018923             | $3.24 \times 10^{-3}$  | ko00910       |
| 8                            | Limonene and<br>pinene degradation                       | 55 (1.71%)                                   | 242 (1.09%)                                         | 0.00043356             | $6.50 \times 10^{-3}$  | ko00903       |
| 9                            | DNA replication                                          | 36 (1.12%)                                   | 150 (0.68%)                                         | 0.00145221             | $1.94 \times 10^{-2}$  | ko03030       |
| 10                           | Vitamin B6 metabolism                                    | 10 (0.31%)                                   | 26 (0.12%)                                          | 0.00240533             | $2.89 \times 10^{-2}$  | ko00750       |
| 11                           | Photosynthesis                                           | 27 (0.84%)                                   | 111 (0.5%)                                          | 0.00438944             | $4.79 \times 10^{-2}$  | ko00195       |
| 12                           | Flavonoid biosynthesis                                   | 55 (1.71%)                                   | 270 (1.22%)                                         | 0.00569307             | $5.69 \times 10^{-2}$  | ko00941       |
| 13                           | Pentose phosphate pathway                                | 24 (0.74%)                                   | 98 (0.44%)                                          | 0.00636964             | $5.88 \times 10^{-2}$  | ko00030       |
| 14                           | Glyoxylate and<br>dicarboxylate metabolism               | 18 (0.56%)                                   | 69 (0.31%)                                          | 0.00861442             | $6.99 \times 10^{-2}$  | ko00630       |
| 15                           | Fructose and<br>mannose metabolism                       | 28 (0.87%)                                   | 122 (0.55%)                                         | 0.00873829             | $6.99 \times 10^{-2}$  | ko00051       |
| 16                           | Phenylalanine metabolism                                 | 44 (1.36%)                                   | 219 (0.99%)                                         | 0.01555736             | $1.17 \times 10^{-1}$  | ko00360       |
| 17                           | Base excision repair                                     | 22 (0.68%)                                   | 100 (0.45%)                                         | 0.02926962             | $2.07 \times 10^{-1}$  | ko03410       |
| 18                           | Mismatch repair                                          | 23 (0.71%)                                   | 109 (0.49%)                                         | 0.04068947             | $2.50 \times 10^{-1}$  | ko03430       |
| 19                           | Linoleic acid metabolism                                 | 10 (0.31%)                                   | 38 (0.17%)                                          | 0.04155532             | $2.50 \times 10^{-1}$  | ko00591       |
| 20                           | Flavone and<br>flavonol biosynthesis                     | 18 (0.56%)                                   | 81 (0.37%)                                          | 0.04161865             | $2.50 \times 10^{-1}$  | ko00944       |
| 21                           | Cyanoamino acid metabolism                               | 32 (0.99%)                                   | 165 (0.75%)                                         | 0.05326877             | $2.91 \times 10^{-1}$  | ko00460       |
| 22                           | Other glycan degradation                                 | 35 (1.09%)                                   | 183 (0.83%)                                         | 0.05342466             | $2.91 \times 10^{-1}$  | ko00511       |

Table S3. *Cont.*

| KEGG Pathway Results in Leaf |                                                        |                                              |                                                     |                 |                       |               |
|------------------------------|--------------------------------------------------------|----------------------------------------------|-----------------------------------------------------|-----------------|-----------------------|---------------|
| #                            | Pathway                                                | DEGs with<br>Pathway<br>Annotation<br>(3224) | All Genes<br>with Pathway<br>Annotation<br>(22,126) | <i>p</i> -Value | <i>Q</i> -Value       | Pathway<br>ID |
| 23                           | Amino sugar and nucleotide<br>sugar metabolism         | 48 (1.49%)                                   | 263 (1.19%)                                         | 0.05646386      | $2.95 \times 10^{-1}$ | ko00520       |
| 24                           | Alanine, aspartate and<br>glutamate metabolism         | 27 (0.84%)                                   | 137 (0.62%)                                         | 0.06033482      | $3.02 \times 10^{-1}$ | ko00250       |
| 25                           | Biosynthesis of<br>secondary metabolites               | 381 (11.82%)                                 | 2444 (11.05%)                                       | 0.07000647      | $3.24 \times 10^{-1}$ | ko01110       |
| 26                           | Non-homologous end-joining                             | 5 (0.16%)                                    | 16 (0.07%)                                          | 0.07127773      | $3.24 \times 10^{-1}$ | ko03450       |
| 27                           | Steroid biosynthesis                                   | 25 (0.78%)                                   | 128 (0.58%)                                         | 0.07474566      | $3.24 \times 10^{-1}$ | ko00100       |
| 28                           | Riboflavin metabolism                                  | 10 (0.31%)                                   | 42 (0.19%)                                          | 0.0756547       | $3.24 \times 10^{-1}$ | ko00740       |
| 29                           | Lysine degradation                                     | 13 (0.4%)                                    | 59 (0.27%)                                          | 0.07980274      | $3.30 \times 10^{-1}$ | ko00310       |
| 30                           | Glycosphingolipid<br>biosynthesis—ganglio series       | 9 (0.28%)                                    | 38 (0.17%)                                          | 0.09165191      | $3.57 \times 10^{-1}$ | ko00604       |
| 31                           | Glycolysis/Gluconeogenesis                             | 41 (1.27%)                                   | 229 (1.03%)                                         | 0.09213469      | $3.57 \times 10^{-1}$ | ko00010       |
| 32                           | Glycosaminoglycan<br>degradation                       | 10 (0.31%)                                   | 44 (0.2%)                                           | 0.09777733      | $3.67 \times 10^{-1}$ | ko00531       |
| 33                           | Circadian rhythm—plant                                 | 47 (1.46%)                                   | 269 (1.22%)                                         | 0.1039593       | $3.78 \times 10^{-1}$ | ko04712       |
| 34                           | Carotenoid biosynthesis                                | 37 (1.15%)                                   | 209 (0.94%)                                         | 0.1183701       | $4.18 \times 10^{-1}$ | ko00906       |
| 35                           | Synthesis and degradation of<br>ketone bodies          | 3 (0.09%)                                    | 9 (0.04%)                                           | 0.1317673       | $4.52 \times 10^{-1}$ | ko00072       |
| 36                           | Starch and<br>sucrose metabolism                       | 97 (3.01%)                                   | 601 (2.72%)                                         | 0.1478804       | $4.82 \times 10^{-1}$ | ko00500       |
| 37                           | alpha-Linolenic<br>acid metabolism                     | 26 (0.81%)                                   | 145 (0.66%)                                         | 0.1510516       | $4.82 \times 10^{-1}$ | ko00592       |
| 38                           | Plant-pathogen interaction                             | 257 (7.97%)                                  | 1663 (7.52%)                                        | 0.1527424       | $4.82 \times 10^{-1}$ | ko04626       |
| 39                           | One carbon pool by folate                              | 8 (0.25%)                                    | 39 (0.18%)                                          | 0.1992956       | $6.13 \times 10^{-1}$ | ko00670       |
| 40                           | Propanoate metabolism                                  | 14 (0.43%)                                   | 76 (0.34%)                                          | 0.2104047       | $6.25 \times 10^{-1}$ | ko00640       |
| 41                           | Biotin metabolism                                      | 2 (0.06%)                                    | 6 (0.03%)                                           | 0.2134701       | $6.25 \times 10^{-1}$ | ko00780       |
| 42                           | Fatty acid metabolism                                  | 13 (0.4%)                                    | 71 (0.32%)                                          | 0.22817         | $6.52 \times 10^{-1}$ | ko00071       |
| 43                           | Nicotinate and<br>nicotinamide metabolism              | 5 (0.16%)                                    | 24 (0.11%)                                          | 0.2657115       | $7.42 \times 10^{-1}$ | ko00760       |
| 44                           | Anthocyanin biosynthesis                               | 3 (0.09%)                                    | 13 (0.06%)                                          | 0.2917728       | $7.96 \times 10^{-1}$ | ko00942       |
| 45                           | Peroxisome                                             | 27 (0.84%)                                   | 167 (0.75%)                                         | 0.309763        | $8.22 \times 10^{-1}$ | ko04146       |
| 46                           | Glycerophospholipid<br>metabolism                      | 38 (1.18%)                                   | 240 (1.08%)                                         | 0.3149741       | $8.22 \times 10^{-1}$ | ko00564       |
| 47                           | Phosphatidylinositol<br>signaling system               | 28 (0.87%)                                   | 175 (0.79%)                                         | 0.3261654       | $8.33 \times 10^{-1}$ | ko04070       |
| 48                           | Valine, leucine and<br>isoleucine degradation          | 14 (0.43%)                                   | 85 (0.38%)                                          | 0.3538673       | $8.85 \times 10^{-1}$ | ko00280       |
| 49                           | Phenylalanine, tyrosine and<br>tryptophan biosynthesis | 13 (0.4%)                                    | 79 (0.36%)                                          | 0.363401        | $8.90 \times 10^{-1}$ | ko00400       |

Table S3. *Cont.*

| KEGG Pathway Results in Leaf |                                                           |                                              |                                                     |                 |                       |               |
|------------------------------|-----------------------------------------------------------|----------------------------------------------|-----------------------------------------------------|-----------------|-----------------------|---------------|
| #                            | Pathway                                                   | DEGs with<br>Pathway<br>Annotation<br>(3224) | All Genes<br>with Pathway<br>Annotation<br>(22,126) | <i>p</i> -Value | <i>Q</i> -Value       | Pathway<br>ID |
| 50                           | ABC transporters                                          | 39 (1.21%)                                   | 254 (1.15%)                                         | 0.3876352       | $9.23 \times 10^{-1}$ | ko02010       |
| 51                           | Pentose and<br>glucuronate interconversions               | 52 (1.61%)                                   | 342 (1.55%)                                         | 0.3920836       | $9.23 \times 10^{-1}$ | ko00040       |
| 52                           | Homologous recombination                                  | 23 (0.71%)                                   | 149 (0.67%)                                         | 0.4168315       | $9.56 \times 10^{-1}$ | ko03440       |
| 53                           | Ubiquinone and other<br>terpenoid-quinone biosynthesis    | 15 (0.47%)                                   | 96 (0.43%)                                          | 0.427957        | $9.56 \times 10^{-1}$ | ko00130       |
| 54                           | Selenocompound metabolism                                 | 6 (0.19%)                                    | 36 (0.16%)                                          | 0.4302276       | $9.56 \times 10^{-1}$ | ko00450       |
| 55                           | Tyrosine metabolism                                       | 13 (0.4%)                                    | 84 (0.38%)                                          | 0.45346         | $9.89 \times 10^{-1}$ | ko00350       |
| 56                           | Caffeine metabolism                                       | 1 (0.03%)                                    | 4 (0.02%)                                           | 0.4674023       | 1.00                  | ko00232       |
| 57                           | Nucleotide excision repair                                | 27 (0.84%)                                   | 181 (0.82%)                                         | 0.4795134       | 1.00                  | ko03420       |
| 58                           | Indole alkaloid biosynthesis                              | 8 (0.25%)                                    | 52 (0.24%)                                          | 0.4932763       | 1.00                  | ko00901       |
| 59                           | Sulfur metabolism                                         | 13 (0.4%)                                    | 87 (0.39%)                                          | 0.5070894       | 1.00                  | ko00920       |
| 60                           | Inositol phosphate metabolism                             | 22 (0.68%)                                   | 149 (0.67%)                                         | 0.5087081       | 1.00                  | ko00562       |
| 61                           | Sphingolipid metabolism                                   | 11 (0.34%)                                   | 74 (0.33%)                                          | 0.5215932       | 1.00                  | ko00600       |
| 62                           | Pyruvate metabolism                                       | 23 (0.71%)                                   | 157 (0.71%)                                         | 0.5235224       | 1.00                  | ko00620       |
| 63                           | Benzoxazinoid biosynthesis                                | 9 (0.28%)                                    | 62 (0.28%)                                          | 0.5598158       | 1.00                  | ko00402       |
| 64                           | Isoquinoline alkaloid biosynthesis                        | 5 (0.16%)                                    | 34 (0.15%)                                          | 0.5649579       | 1.00                  | ko00950       |
| 65                           | Galactose metabolism                                      | 15 (0.47%)                                   | 105 (0.47%)                                         | 0.5754183       | 1.00                  | ko00052       |
| 66                           | Folate biosynthesis                                       | 4 (0.12%)                                    | 28 (0.13%)                                          | 0.5984961       | 1.00                  | ko00790       |
| 67                           | Ether lipid metabolism                                    | 9 (0.28%)                                    | 65 (0.29%)                                          | 0.6194095       | 1.00                  | ko00565       |
| 68                           | Glycerolipid metabolism                                   | 16 (0.5%)                                    | 115 (0.52%)                                         | 0.6197257       | 1.00                  | ko00561       |
| 69                           | Brassinosteroid biosynthesis                              | 4 (0.12%)                                    | 34 (0.15%)                                          | 0.7505742       | 1.00                  | ko00905       |
| 70                           | Cysteine and methionine<br>metabolism                     | 24 (0.74%)                                   | 184 (0.83%)                                         | 0.7523371       | 1.00                  | ko00270       |
| 71                           | Arachidonic acid metabolism                               | 4 (0.12%)                                    | 35 (0.16%)                                          | 0.7710338       | 1.00                  | ko00590       |
| 72                           | Pyrimidine metabolism                                     | 49 (1.52%)                                   | 371 (1.68%)                                         | 0.7937725       | 1.00                  | ko00240       |
| 73                           | Lysine biosynthesis                                       | 5 (0.16%)                                    | 45 (0.2%)                                           | 0.804655        | 1.00                  | ko00300       |
| 74                           | Valine, leucine and<br>isoleucine biosynthesis            | 10 (0.31%)                                   | 85 (0.38%)                                          | 0.8110584       | 1.00                  | ko00290       |
| 75                           | Tropane, piperidine and pyridine<br>alkaloid biosynthesis | 7 (0.22%)                                    | 62 (0.28%)                                          | 0.8179297       | 1.00                  | ko00960       |
| 76                           | Regulation of autophagy                                   | 19 (0.59%)                                   | 156 (0.71%)                                         | 0.832077        | 1.00                  | ko04140       |
| 77                           | Terpenoid backbone biosynthesis                           | 9 (0.28%)                                    | 80 (0.36%)                                          | 0.8423866       | 1.00                  | ko00900       |
| 78                           | Metabolic pathways                                        | 670 (20.78%)                                 | 4744 (21.44%)                                       | 0.8437551       | 1.00                  | ko01100       |
| 79                           | Fatty acid elongation                                     | 1 (0.03%)                                    | 12 (0.05%)                                          | 0.848979        | 1.00                  | ko00062       |
| 80                           | Thiamine metabolism                                       | 1 (0.03%)                                    | 12 (0.05%)                                          | 0.848979        | 1.00                  | ko00730       |
| 81                           | Zeatin biosynthesis                                       | 16 (0.5%)                                    | 136 (0.61%)                                         | 0.8547489       | 1.00                  | ko00908       |
| 82                           | beta-Alanine metabolism                                   | 8 (0.25%)                                    | 74 (0.33%)                                          | 0.8629269       | 1.00                  | ko00410       |

Table S3. *Cont.*

| KEGG Pathway Results in Leaf |                                                 |                                              |                                                     |                 |                 |               |
|------------------------------|-------------------------------------------------|----------------------------------------------|-----------------------------------------------------|-----------------|-----------------|---------------|
| #                            | Pathway                                         | DEGs with<br>Pathway<br>Annotation<br>(3224) | All Genes<br>with Pathway<br>Annotation<br>(22,126) | <i>p</i> -Value | <i>Q</i> -Value | Pathway<br>ID |
| 83                           | Arginine and proline metabolism                 | 18 (0.56%)                                   | 153 (0.69%)                                         | 0.866467        | 1.00            | ko00330       |
| 84                           | Ascorbate and<br>aldarate metabolism            | 17 (0.53%)                                   | 146 (0.66%)                                         | 0.8713508       | 1.00            | ko00053       |
| 85                           | Pantothenate and<br>CoA biosynthesis            | 6 (0.19%)                                    | 60 (0.27%)                                          | 0.8874153       | 1.00            | ko00770       |
| 86                           | Glutathione metabolism                          | 19 (0.59%)                                   | 166 (0.75%)                                         | 0.8986583       | 1.00            | ko00480       |
| 87                           | Ubiquitin mediated proteolysis                  | 54 (1.67%)                                   | 430 (1.94%)                                         | 0.898718        | 1.00            | ko04120       |
| 88                           | Monoterpenoid biosynthesis                      | 1 (0.03%)                                    | 16 (0.07%)                                          | 0.9195964       | 1.00            | ko00902       |
| 89                           | Tryptophan metabolism                           | 23 (0.71%)                                   | 205 (0.93%)                                         | 0.9328128       | 1.00            | ko00380       |
| 90                           | RNA polymerase                                  | 16 (0.5%)                                    | 152 (0.69%)                                         | 0.9426849       | 1.00            | ko03020       |
| 91                           | Biosynthesis of unsaturated<br>fatty acids      | 8 (0.25%)                                    | 87 (0.39%)                                          | 0.9500522       | 1.00            | ko01040       |
| 92                           | Histidine metabolism                            | 3 (0.09%)                                    | 41 (0.19%)                                          | 0.9501572       | 1.00            | ko00340       |
| 93                           | SNARE interactions in<br>vesicular transport    | 12 (0.37%)                                   | 123 (0.56%)                                         | 0.956367        | 1.00            | ko04130       |
| 94                           | Diterpenoid biosynthesis                        | 9 (0.28%)                                    | 98 (0.44%)                                          | 0.9585866       | 1.00            | ko00904       |
| 95                           | Glucosinolate biosynthesis                      | 10 (0.31%)                                   | 107 (0.48%)                                         | 0.9596785       | 1.00            | ko00966       |
| 96                           | RNA transport                                   | 71 (2.2%)                                    | 588 (2.66%)                                         | 0.9664407       | 1.00            | ko03013       |
| 97                           | Fatty acid biosynthesis                         | 6 (0.19%)                                    | 74 (0.33%)                                          | 0.9679602       | 1.00            | ko00061       |
| 98                           | Other types of<br><i>O</i> -glycan biosynthesis | 1 (0.03%)                                    | 22 (0.1%)                                           | 0.9687728       | 1.00            | ko00514       |
| 99                           | Butanoate metabolism                            | 5 (0.16%)                                    | 65 (0.29%)                                          | 0.9692734       | 1.00            | ko00650       |
| 100                          | Photosynthesis—antenna proteins                 | 2 (0.06%)                                    | 35 (0.16%)                                          | 0.9719417       | 1.00            | ko00196       |
| 101                          | Porphyrin and<br>chlorophyll metabolism         | 11 (0.34%)                                   | 121 (0.55%)                                         | 0.9735012       | 1.00            | ko00860       |
| 102                          | Natural killer cell<br>mediated cytotoxicity    | 10 (0.31%)                                   | 119 (0.54%)                                         | 0.984965        | 1.00            | ko04650       |
| 103                          | <i>N</i> -Glycan biosynthesis                   | 7 (0.22%)                                    | 93 (0.42%)                                          | 0.9872724       | 1.00            | ko00510       |
| 104                          | Ribosome biogenesis<br>in eukaryotes            | 30 (0.93%)                                   | 291 (1.32%)                                         | 0.9874966       | 1.00            | ko03008       |
| 105                          | Phagosome                                       | 27 (0.84%)                                   | 271 (1.22%)                                         | 0.9905481       | 1.00            | ko04145       |
| 106                          | Taurine and<br>hypotaurine metabolism           | 1 (0.03%)                                    | 33 (0.15%)                                          | 0.9944895       | 1.00            | ko00430       |
| 107                          | Purine metabolism                               | 40 (1.24%)                                   | 388 (1.75%)                                         | 0.9949561       | 1.00            | ko00230       |
| 108                          | Endocytosis                                     | 24 (0.74%)                                   | 264 (1.19%)                                         | 0.9972402       | 1.00            | ko04144       |
| 109                          | Protein export                                  | 7 (0.22%)                                    | 113 (0.51%)                                         | 0.998366        | 1.00            | ko03060       |
| 110                          | Citrate cycle (TCA cycle)                       | 7 (0.22%)                                    | 115 (0.52%)                                         | 0.998683        | 1.00            | ko00020       |
| 111                          | Circadian rhythm—mammal                         | 1 (0.03%)                                    | 52 (0.24%)                                          | 0.9997252       | 1.00            | ko04710       |
| 112                          | Basal transcription factors                     | 4 (0.12%)                                    | 95 (0.43%)                                          | 0.9997404       | 1.00            | ko03022       |

Table S3. *Cont.*

| KEGG Pathway Results in Leaf |                                                           |                                              |                                                     |                 |                 |               |
|------------------------------|-----------------------------------------------------------|----------------------------------------------|-----------------------------------------------------|-----------------|-----------------|---------------|
| #                            | Pathway                                                   | DEGs with<br>Pathway<br>Annotation<br>(3224) | All Genes<br>with Pathway<br>Annotation<br>(22,126) | <i>p</i> -Value | <i>Q</i> -Value | Pathway<br>ID |
| 113                          | Spliceosome                                               | 45 (1.4%)                                    | 486 (2.2%)                                          | 0.9998487       | 1.00            | ko03040       |
| 114                          | RNA degradation                                           | 22 (0.68%)                                   | 291 (1.32%)                                         | 0.9999221       | 1.00            | ko03018       |
| 115                          | Glycosylphosphatidylinositol<br>(GPI)-anchor biosynthesis | 15 (0.47%)                                   | 226 (1.02%)                                         | 0.999937        | 1.00            | ko00563       |
| 116                          | Aminoacyl-tRNA biosynthesis                               | 5 (0.16%)                                    | 129 (0.58%)                                         | 0.9999837       | 1.00            | ko00970       |
| 117                          | Protein processing in<br>endoplasmic reticulum            | 51 (1.58%)                                   | 603 (2.73%)                                         | 0.9999985       | 1.00            | ko04141       |
| 118                          | Oxidative phosphorylation                                 | 14 (0.43%)                                   | 268 (1.21%)                                         | 0.9999997       | 1.00            | ko00190       |
| 119                          | Proteasome                                                | 3 (0.09%)                                    | 134 (0.61%)                                         | 0.9999998       | 1.00            | ko03050       |
| 120                          | mRNA surveillance pathway                                 | 13 (0.4%)                                    | 332 (1.5%)                                          | 1               | 1.00            | ko03015       |

Table S4 Selected genes and corresponding primer sequences used for qRT-PCR (quantitative Real-Time PCR).

| Gene Name         | Primers (5'-3')                                      | Used for      |
|-------------------|------------------------------------------------------|---------------|
| <i>Bra008435R</i> | CTCCCAAGAAACGCAA<br>GCAACTAACACGGACTGA               | Real-time PCR |
| <i>Bra034592R</i> | TTTAGGAAGCAGAGCGAGCG<br>TTGAATGCTTTTTTGATAACGTCTG    | Real-time PCR |
| <i>Bra018346R</i> | CTCCTGCGCCGTTAGTGCTA<br>GAAGATTGGTTAACGCGGAGAA       | Real-time PCR |
| <i>Bra024089R</i> | TCTTCTTTGCGGCTCTTCTTG<br>TGTGACGGTTCCTGCTGAGTTA      | Real-time PCR |
| <i>Bra011648R</i> | GTGCCGGCTTCGAGTTTCTT<br>CTCTGGAACGAGCTGCAGATTC       | Real-time PCR |
| <i>Bra011179R</i> | ATTCTCTTCTCAGCTCTCCTCG<br>CAGGTAGAAAGTTGTGACCGTGC    | Real-time PCR |
| <i>Bra004727R</i> | CTGCTCAGCCATAGACACCCTTA<br>TCCATGAGCTCAAACACAACGTA   | Real-time PCR |
| <i>Bra038652R</i> | GAGAGAGGTCGCAAGATTGATGA<br>ATCCACTCCACAAATCAGCTGC    | Real-time PCR |
| <i>Bra004617R</i> | GTGGAGAAAGCCTCAATAGAAGATG<br>TGATCTTCGAGGTCTTGAGCAAC | Real-time PCR |
| <i>Bra011815R</i> | GCCGTAAAGTACATCGAAAGAGG<br>TAGTACCTTGCTTCGTCTTCGCT   | Real-time PCR |
| <i>Bra004967R</i> | AGAGAGACTCGAGATCATGGACG<br>GCTGCAAGTCTCTTCCTTATCGT   | Real-time PCR |

**Table S4. Cont.**

| <b>Gene Name</b>  | <b>Primers (5'-3')</b>                              | <b>Used for</b> |
|-------------------|-----------------------------------------------------|-----------------|
| <i>Bra038652L</i> | GAGAGAGGTCGCAAGATTGATGA<br>ATCCACTCCACAAATCAGCTGC   | Real-time PCR   |
| <i>Bra017629L</i> | GGGAAGACGAAGAAGAAACAGAA<br>AAGTAGAGAACCCATAACGAGCG  | Real-time PCR   |
| <i>Bra004727L</i> | CTGCTCAGCCATAGACACCCTTA<br>TCCATGAGCTCAAACACAACGTA  | Real-time PCR   |
| <i>Bra002599R</i> | GCGTCGTTTAGTGAGTTCAGCTT<br>AACCTCTCGCTCCTCAACTGC    | Real-time PCR   |
| <i>Bra034592L</i> | TTTAGGAAGCAGAGCGAGCG<br>TTGAATGCTTTTTTGATAACGTCTG   | Real-time PCR   |
| <i>Bra018346L</i> | CTCCTGCGCCGTTAGTGCTA<br>GAAGATTGGTTAACGCGGAGAA      | Real-time PCR   |
| <i>Bra003077R</i> | TCAACGCTCCTGTCCATATCG<br>TAGCTGGCAACCCTGATCTCA      | Real-time PCR   |
| <i>Bra011179L</i> | ATTCTCTTCTCAGCTCTCCTCG<br>CAGGTAGAAAGTTGTGACCGTGC   | Real-time PCR   |
| <i>Bra003077R</i> | TCAACGCTCCTGTCCATATCG<br>TAGCTGGCAACCCTGATCTCA      | Real-time PCR   |
| <i>Bra017629R</i> | GGGAAGACGAAGAAGAAACAGAA<br>AAGTAGAGAACCCATAACGAGCG  | Real-time PCR   |
| <i>Bra024089L</i> | TCTTCTTTGCGGCTCTTCTTG<br>TGTGACGGTTCCTGCTGAGTTA     | Real-time PCR   |
| <i>Bra008435L</i> | CTCCCAAGAAACGCAA<br>GCAACTAACACGGACTGA              | Real-time PCR   |
| <i>Bra023756L</i> | ATACTGATCTGTGTTTCTCCGGC<br>AGAGGACAATGAAGGCGATGAACT | Real-time PCR   |
| <i>Bra004967L</i> | AGAGAGACTCGAGATCATGGACG<br>GCTGCAAGTCTCTTCCTTATCGT  | Real-time PCR   |

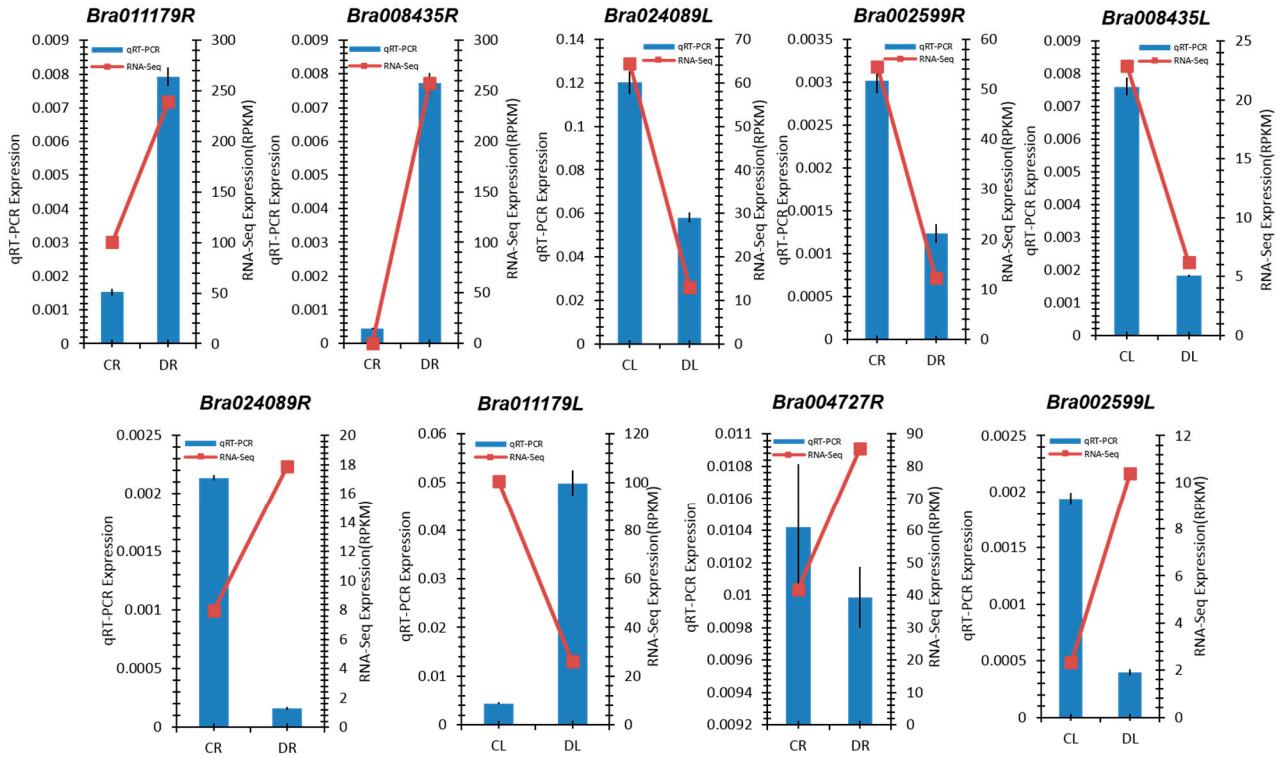

**Figure S1.** qRT-PCR (quantitative Real-Time PCR) verification of differentially expressed unigenes in drought sensitive material 2021. DR means drought stress in root; CR means control check in root; DL means drought stress in leaf; CL means control check in leaf. RNA-Seq expression (RPKM) is the Q2 RNA-Seq expression.
